# Supplementary material
Source: MDPI journal article supplement (https://www.mdpi.com/2227-9717/10/2/424)
Supplement: s1 [file s1]

# Supplementary information

CERTIFICATE OF ANALYSIS

|                                            |         |                                                  |
|--------------------------------------------|---------|--------------------------------------------------|
| Product Name                               |         | Silverjet DGH ink for Reverse offset             |
| Silver Content (wt%)                       |         | 39.467                                           |
| Viscosity (cps)<br>Brookfield<br>LVDV- I + | @100rpm | 1.41                                             |
|                                            | @60rpm  | 1.45                                             |
|                                            | @30rpm  | 1.50                                             |
| Surface Tension ( mN/m )<br>KRUSS K9ET-S   |         | 24.8                                             |
| Main Dispersion Matrix                     |         | Octane Base                                      |
| Curing Temp. & Time                        |         | 400 ~ 520°C*10~30min                             |
| Storage condition                          |         | Keep at 7 ~ 10°C<br>Keep away from heat or light |

#S1. Reverse off-set ink datasheet
